# Supplementary material
Source: PubMed Central journal article supplement (PMC3473198)

**Figure 1.** Effects of T+E<sub>2</sub> on tissue compartments of the prostatic urethra in male C57BL/6 mice.

(A) Measurements were contoured by hand in ImageJ to determine the total cross-sectional area (total; outlined in black), striated rhabdosphincter (RB; pink) and periurethral glandular tissue (PGT; yellow) of the prostatic urethra. There were no significant differences between untreated and T+E<sub>2</sub>-treated mice in morphometric analysis of the proximal urethra in (B) total cross-sectional area of the prostatic urethra, (C) RB, or (D) PGT.

**Video 1.** Video shows BALB/c mouse in metabolic cage for noninvasive uroflow testing.

Untreated male mouse shows several sustained voids (Voids 1-3), while mouse treated with T+E<sub>2</sub> displays droplet voiding pattern (Voids 1-6).

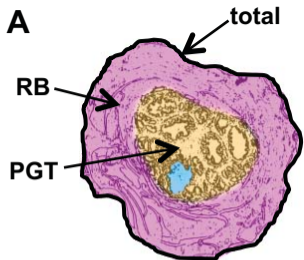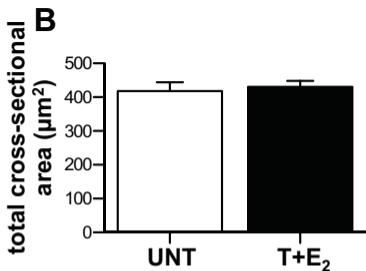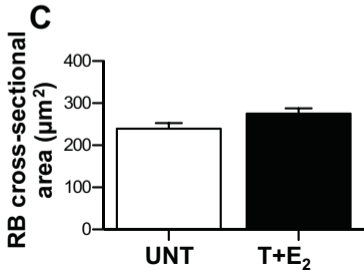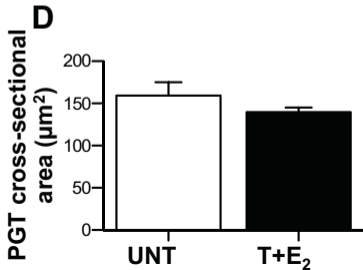

Supplement: supp_en.2012-1522_en-12-1522_Legends.pdf [file supp_en.2012-1522_en-12-1522_Legends.pdf]
